# Supplementary material for: Genetic Diversity and Selection Signatures in Jianchang Black Goats Revealed by Whole-Genome Sequencing Data
Source: MDPI journal article supplement (doi:10.3390/ani12182365), 2022-09-10
Supplement: s1 [file s1]

**Table S5 Summary of the linear relationship between the chromosome length and the total ROH length or the total ROH number per chromosome in two other black breeds and Bezoars**

| <b>Breed</b> | <b>Relationship between the chromosome length and the total ROH length</b> | <b>Relationship between the chromosome length and the total ROH number</b> |
|--------------|----------------------------------------------------------------------------|----------------------------------------------------------------------------|
| JT           | b = 1.41<br>( $R^2 = 0.44$ , $P < 2.2 \times 10^{-16}$ )                   | b = 0.53<br>( $R^2 = 0.67$ , $P < 2.2 \times 10^{-16}$ )                   |
| YS           | b = 1.15<br>( $R^2 = 0.14$ , $P < 2.2 \times 10^{-16}$ )                   | b = 0.44<br>( $R^2 = 0.28$ , $P < 2.2 \times 10^{-16}$ )                   |
| Bezoars      | b = 1.62<br>( $R^2 = 0.13$ , $P < 2.2 \times 10^{-16}$ )                   | b = 0.46<br>( $R^2 = 0.29$ , $P < 2.2 \times 10^{-16}$ )                   |

Note: The unit of the total ROH length and the chromosome length were 100 Kb and Mb, respectively.
