# Supplementary figures and images for: Genetic Diversity and Selection Signatures in Jianchang Black Goats Revealed by Whole-Genome Sequencing Data
Source: MDPI journal article supplement (doi:10.3390/ani12182365), 2022-09-10

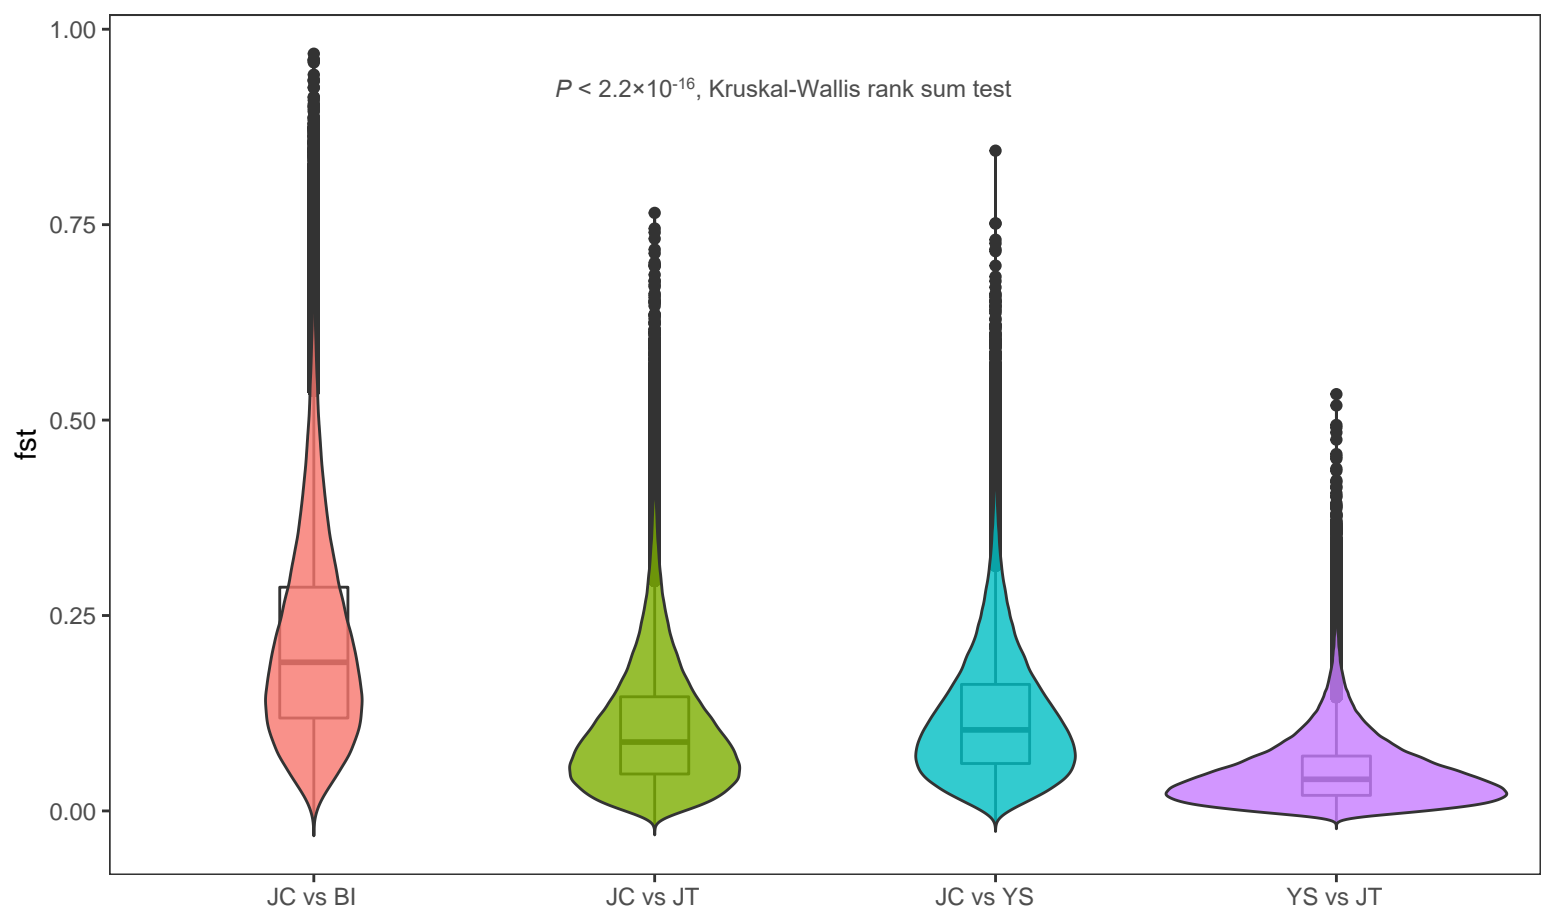

Supplement: s1 [file s1]

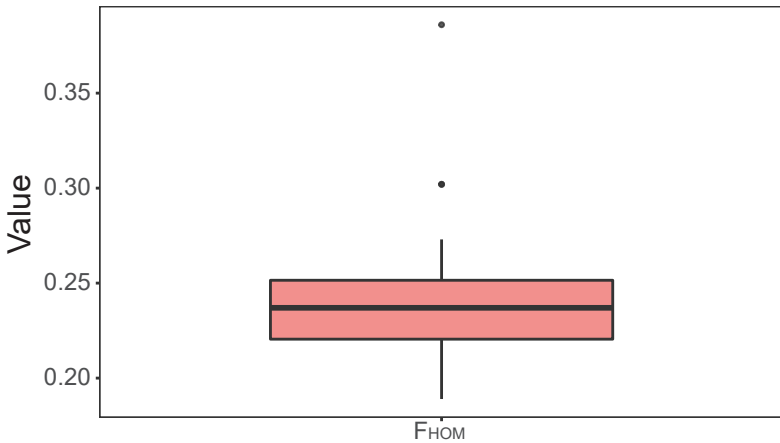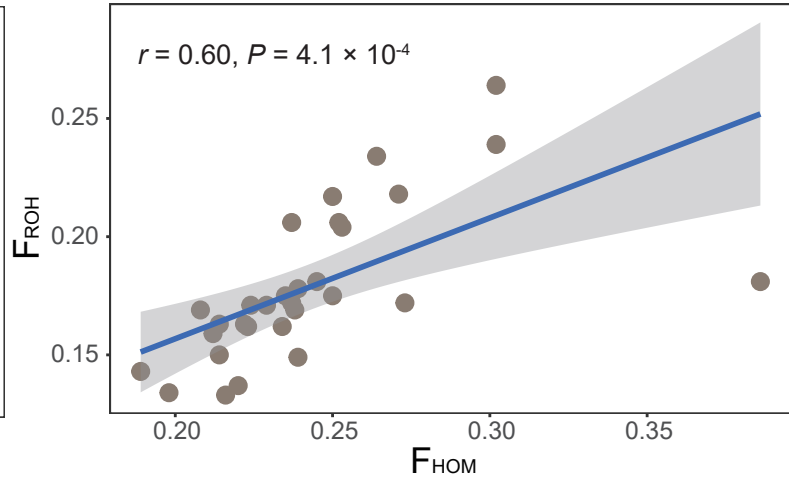

Supplement: s1 [file s1]

# LD decay

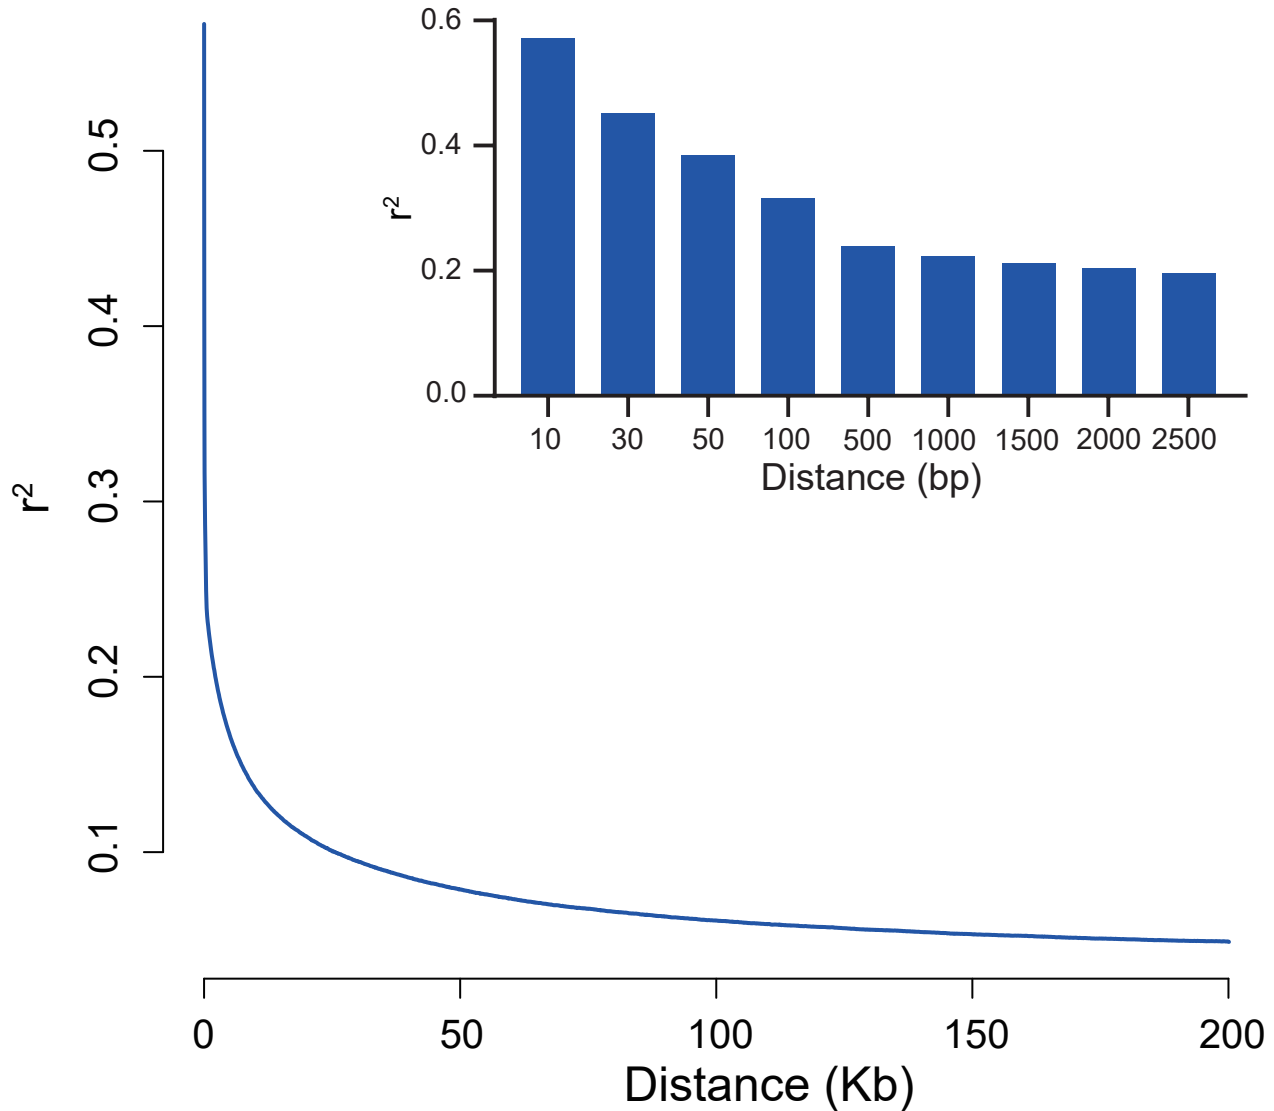

Supplement: s1 [file s1]

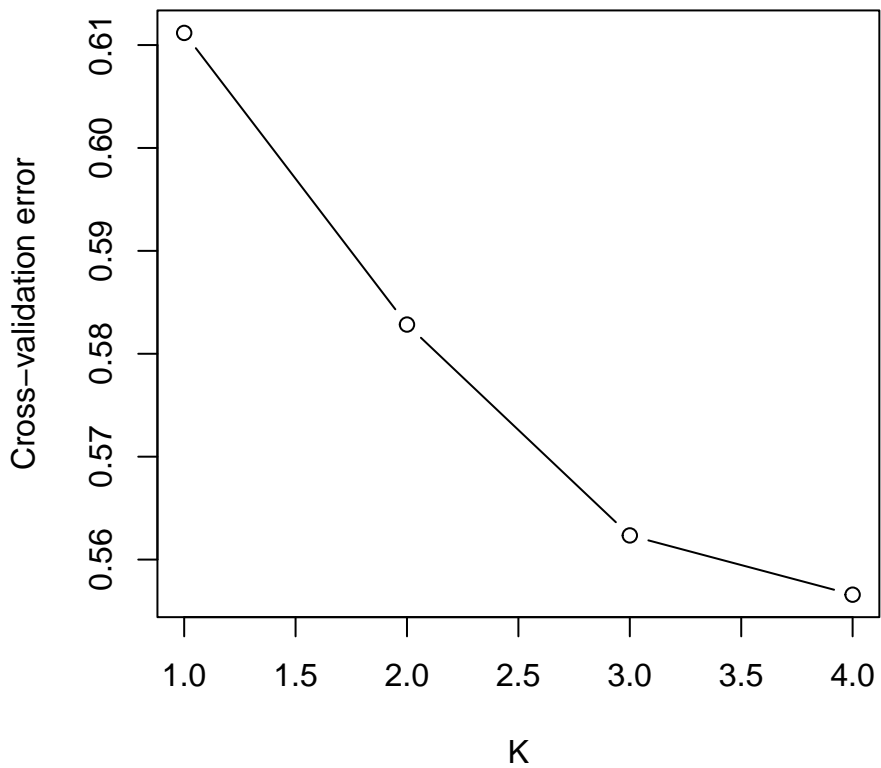

Supplement: s1 [file s1]
